# Supplementary material for: Exploring the p53 connection of cervical cancer pathogenesis involving north-east Indian patients
Source: PubMed Central journal article supplement (PMC7518589; doi:10.1371/journal.pone.0238500), 2020-09-25

# SciGenom Trace Viewer

Sample :E4.4\_E4.FP\_26280-1\_8173  
Trim Start :83  
Trim End :107  
Qv20 Bases :24

Run start: 2016/02/23 19:11:33  
Run stop: 2016/02/23 21:23:31  
PDF created: 2016/02/24 09:05:30

AGCAGCTCCTACACCGCGGCCCC  
10 20

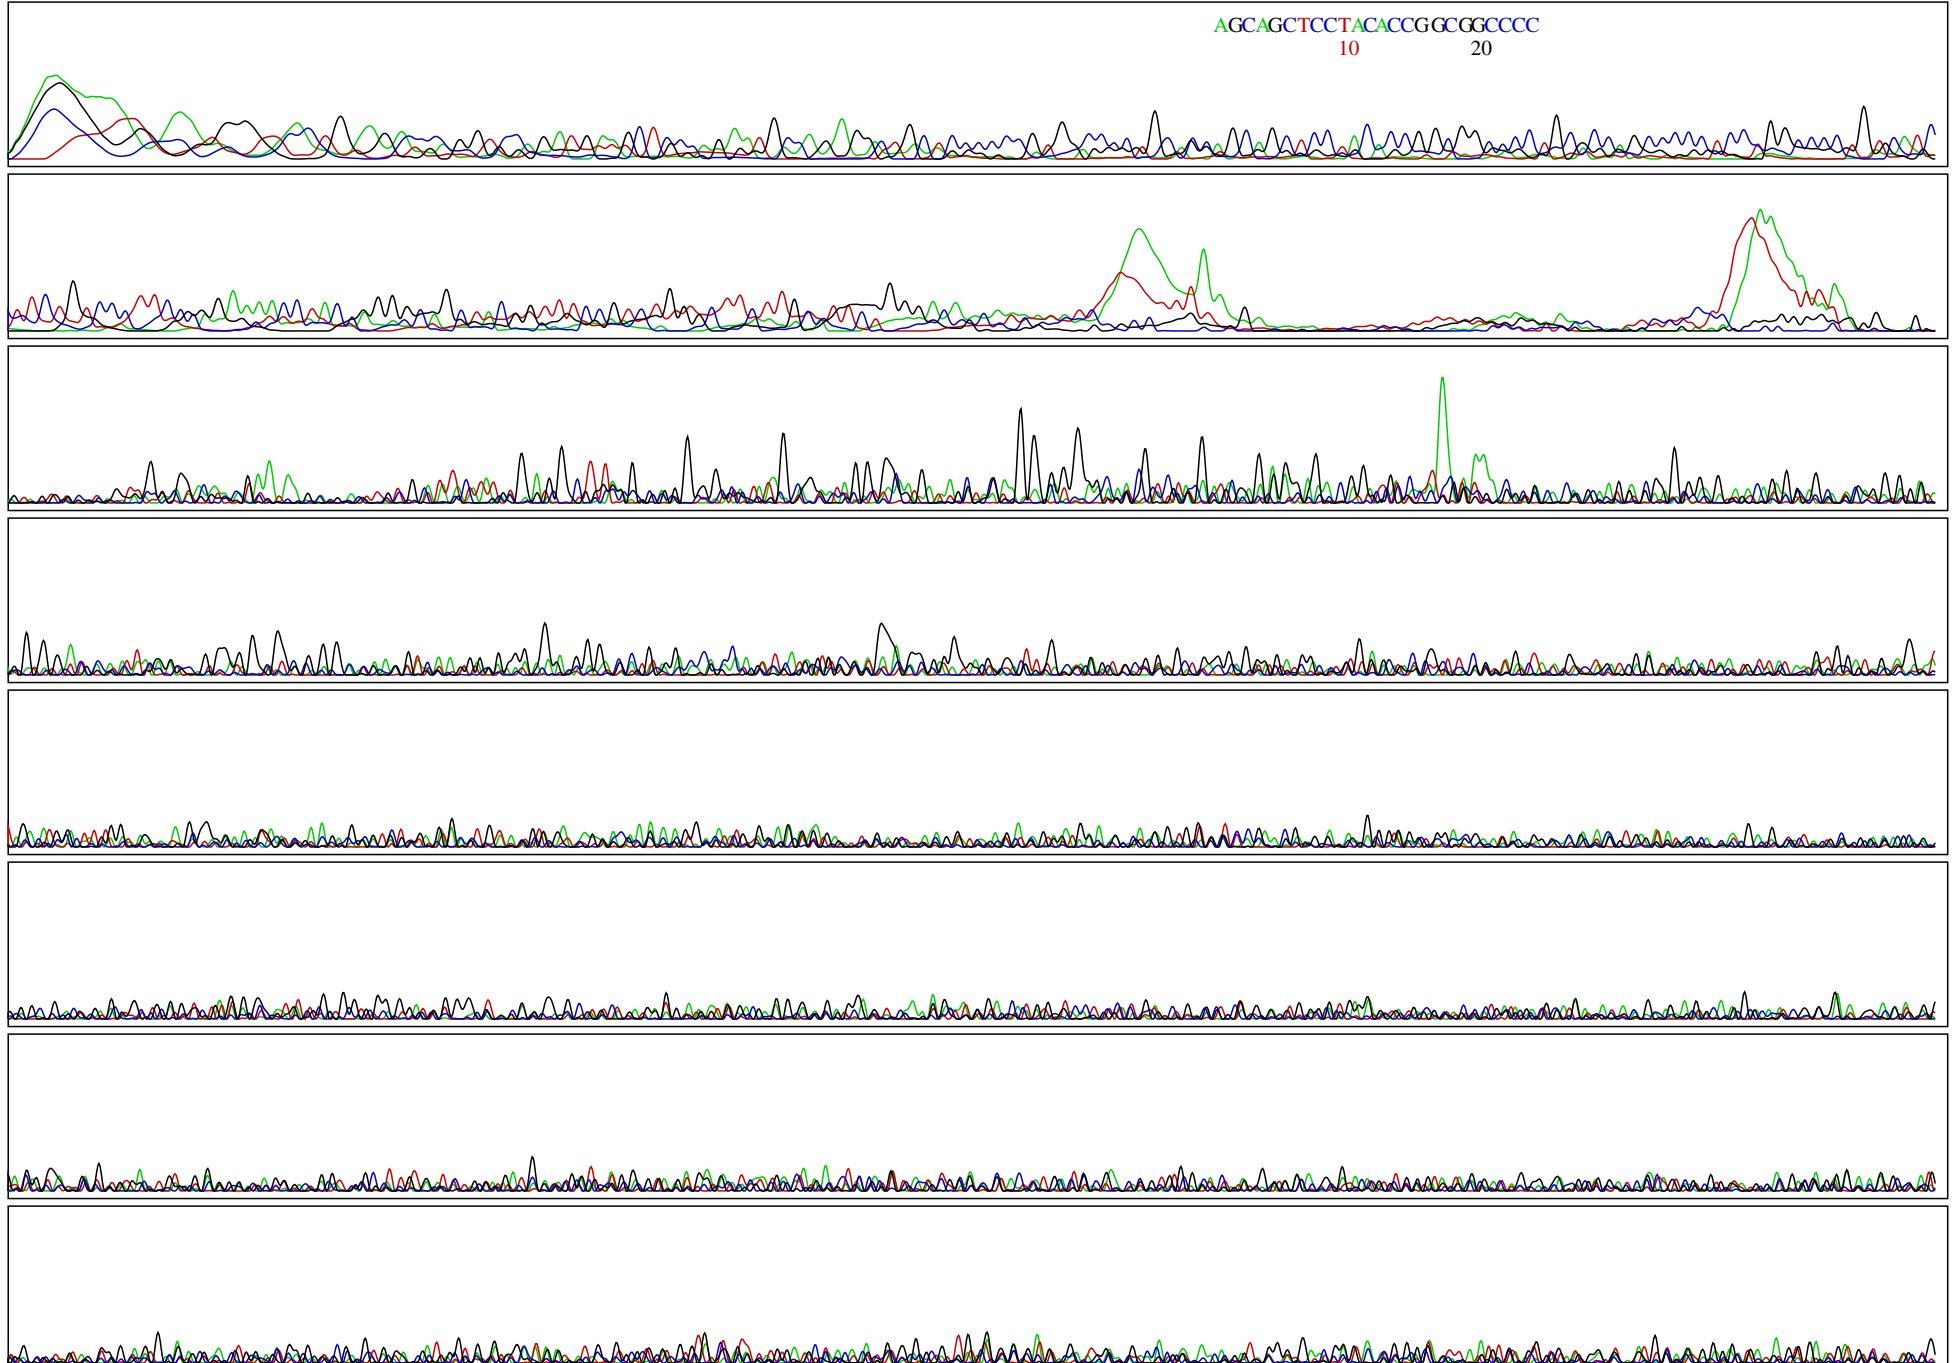

Supplement: pone.0238500.s004.pdf [file pone.0238500.s004.pdf]
